# Supplementary material for: No Harmful Effects of Steroids in Severe Exacerbations&nbsp;of COPD Associated With Influenza
Source: Research Square preprint supplement (doi:10.21203/rs.3.rs-132355/v1), 2021-01-04
Supplement: Supplementary file 1 [file 03339806d493649e4b5630f1.docx]

**Supplementary data**

**No harmful effects of steroids in severe exacerbations of COPD associated with influenza**

**Severin Studer1, Frank Rassouli2, Frederike Waldeck3, Martin Brutsche2, Florent Baty2, Werner C. Albrich(*)3**

1 Department of Internal Medicine, Cantonal Hospital St. Gallen, St. Gallen, Switzerland

2 Lung center, Cantonal Hospital St. Gallen, St. Gallen, Switzerland

3 Division of Infectious Diseases and Hospital Epidemiology, Cantonal Hospital St Gallen, St Gallen, Switzerland

Corresponding author (*):

PD Dr. Werner Albrich, MD, MSCR

Cantonal Hospital St. Gallen

Division of Infectious Diseases and Hospital Epidemiology

Rorschacherstrasse 95

CH-9007 St. Gallen

Switzerland

+41 71 494 2653 Direct

+41 71 494 6114 Fax

[werner.albrich@kssg.ch](mailto:werner.albrich@kssg.ch)

Analysis plan (with detailed ICD-10 codes used for statistical analysis of the database)

**ANALYSIS 1: COMPARISON DURING VS OUTSIDE OF INFLUENZA PERIOD**

**Step 1:** exclude all types of pneumonia patients (as main diagnosis or non-main diagnosis), because they may have been treated differently and there is more evidence for the effectiveness of corticosteroids for pneumonia treatment, i.e.:

       J10.0 - Influenza with pneumonia, other influenza virus identified

       J11.0 - Influenza with pneumonia, virus not identified

       J12* - Viral pneumonia, not elsewhere classified

       J13 - Pneumonia due to *Streptococcus pneumoniae*

       J14 - Pneumonia due to *Haemophilus influenzae*

       J15* - Bacterial pneumonia, not elsewhere classified

       J16* - Pneumonia due to other infectious organisms, not elsewhere classified

       J17* - Pneumonia in diseases classified elsewhere

       J18* - Pneumonia, organism unspecified

**Step 2:** search for patients with AECOPD as **any** diagnosis, i.e.:

       J44.0 - Chronic obstructive pulmonary disease with acute lower respiratory infection

       J44.1 - Chronic obstructive pulmonary disease with acute exacerbation, unspecified

**Step 3:** compare cases that fall within the above-mentioned coding criteria for the time periods during vs. outside of influenza period (Influenza epidemic months, see below) for the following outcomes:

- Mean LOS, days
- In-hospital mortality, %
- Risk of re-hospitalization, %

With hospitalisation-related diagnosis of

- - J44.0 - Chronic obstructive pulmonary disease with acute lower respiratory infection

**OR**

- - J44.1 - Chronic obstructive pulmonary disease with acute exacerbation, unspecified
- Risk of ICU admission, %
- Aspergillosis, %
  - B44.0 - Invasive pulmonary aspergillosis

**OR**

- - B44.1 - Other pulmonary aspergillosis
- Female, %

**ANALYSIS 2: COMPARISON INFLUENZA CODED VS INFLUENZA NOT CODED**

**Step 1:** search for patients with AECOPD **with** influenza (without pneumonia)

**Step 1.1:** exclude all types of pneumonia patients (as main diagnosis or non-main diagnosis), because they may have been treated differently and there is more evidence for the effectiveness of corticosteroids for pneumonia treatment, i.e.

       J10.0 - Influenza with pneumonia, other influenza virus identified

       J11.0 - Influenza with pneumonia, virus not identified

       J12* - Viral pneumonia, not elsewhere classified

       J13 - Pneumonia due to *Streptococcus pneumoniae*

       J14 - Pneumonia due to *Haemophilus influenzae*

       J15* - Bacterial pneumonia, not elsewhere classified

       J16* - Pneumonia due to other infectious organisms, not elsewhere classified

       J17* - Pneumonia in diseases classified elsewhere

       J18* - Pneumonia, organism unspecified

**Step 1.2:** search for patients with AECOPD with influenza (search for all diagnoses as main or non-main diagnosis, because any of them can be either main or non-main diagnosis, depending on the relative weighing of each diagnosis)

       J44.0 - Chronic obstructive pulmonary disease with acute lower respiratory infection

**OR**

       J44.1 - Chronic obstructive pulmonary disease with acute exacerbation, unspecified

**AND**

       J10.1 - Influenza with other respiratory manifestations, other influenza virus identified

**OR**

       J11.1 - Influenza with other respiratory manifestations, virus not identified

**Step 2:** search for patients with AECOPD **without** influenza (without pneumonia).

**Step 2.1:** exclude all types of pneumonia patients (as main or non-main diagnosis), because they may have been treated differently and there is more evidence for the effectiveness of corticosteroids for pneumonia treatment. Also exclude all types of Influenza patients. I.e.

       J09 - Influenza due to certain identified influenza virus

       J10* - Influenza due to other identified influenza virus

       J11* - Influenza, virus not identified

       J12* - Viral pneumonia, not elsewhere classified

       J13 - Pneumonia due to *Streptococcus pneumoniae*

       J14 - Pneumonia due to *Haemophilus influenzae*

       J15* - Bacterial pneumonia, not elsewhere classified

       J16* - Pneumonia due to other infectious organisms, not elsewhere classified

       J17* - Pneumonia in diseases classified elsewhere

       J18* - Pneumonia, organism unspecified

**Step 2.2:** search for patients with AECOPD (search in main or non-main diagnosis, because any of them can be either main or non-main diagnosis, depending on the relative weighing of each diagnosis)

       J44.0 - Chronic obstructive pulmonary disease with acute lower respiratory infection

       J44.1 - Chronic obstructive pulmonary disease with acute exacerbation, unspecified

**Step 3:** Compare cases found in step 1 vs. cases found in step 2 for the following outcomes:

- Mean LOS, days
- In-hospital mortality, %
- Risk of re-hospitalization, %

With hospitalisation-related diagnosis of

- - J44.0 - Chronic obstructive pulmonary disease with acute lower respiratory infection

**OR**

- - J44.1 - Chronic obstructive pulmonary disease with acute exacerbation, unspecified
- Risk of ICU admission, %
- Aspergillosis, %
  - B44.0 - Invasive pulmonary aspergillosis

**OR**

- - B44.1 - Other pulmonary aspergillosis
- Female, %

**ANALYSIS 3: AECOPD + PNEUMONIA + INFLUENZA vs. AECOPD + PNEUMONIA WITHOUT INFLUENZA**

**Step 1:** search for patients with AECOPD with pneumonia **with** influenza (search for all diagnoses as main or non-main diagnosis, because any of them can be either main or non-main diagnosis, depending on the “relative weighing of each diagnosis)

       J44.0 - Chronic obstructive pulmonary disease with acute lower respiratory infection

**OR**

       J44.1 - Chronic obstructive pulmonary disease with acute exacerbation, unspecified

**AND**

       J10.0 - Influenza with pneumonia, other influenza virus identified

**OR**

       J11.0 - Influenza with pneumonia, virus not identified

**Step 2:** search for patients with AECOPD with pneumonia (**without** influenza) (search for all diagnoses as main or non-main diagnosis, because any of them can be either main or non-main diagnosis, depending on the relative weighing of each diagnosis)

       J44.0 - Chronic obstructive pulmonary disease with acute lower respiratory infection

**OR**

       J44.1 - Chronic obstructive pulmonary disease with acute exacerbation, unspecified

**AND**

       J12* - Viral pneumonia, not elsewhere classified

**OR**

       J13 - Pneumonia due to *Streptococcus pneumoniae*

**OR**

       J14 - Pneumonia due to *Haemophilus influenzae*

**OR**

       J15* - Bacterial pneumonia, not elsewhere classified

**OR**

       J16* - Pneumonia due to other infectious organisms, not elsewhere classified

**OR**

       J17* - Pneumonia in diseases classified elsewhere

**OR**

       J18* - Pneumonia, organism unspecified

**Step 3:** Compare cases found in step 1 vs. cases found in step 2 for the following outcomes:

- Mean LOS, days
- In-hospital mortality, %
- Risk of rehospitalization, %

With hospitalisation-related diagnosis of

- - J44.0 - Chronic obstructive pulmonary disease with acute lower respiratory infection

**OR**

- - J44.1 - Chronic obstructive pulmonary disease with acute exacerbation, unspecified
- Risk of ICU admission, %
- Aspergillosis, %
  - B44.0 - Invasive pulmonary aspergillosis

**OR**

- - B44.1 - Other pulmonary aspergillosis
- Empyema, %
  - J85.0 - Gangrene and necrosis of lung

**OR**

- - J85.1 - Abscess of lung with pneumonia

**OR**

- - J85.2 - Abscess of lung without pneumonia

**OR**

- - J86.0 – Pyothorax with fistula

**OR**

- - J86.9 Pyothorax without fistula
- Female, %

Comment:

In the study design of this last analysis 3, swine flu and avian influenza (J09 – Influenza due to certain identified influenza virus) are not included.

Methods 1

National epidemic periods 2011 – 2017, Switzerland

For Switzerland, the defined thresholds and resulting duration for the national epidemic influenza periods from season 2011/2012 to 2017/2018 were as following:

- 2011/2012[[1]](#footnote-1)
  - National epidemic threshold: 67 consultations for cases of influenza-like illness per week per 100’000 inhabitants
  - Influenza epidemic weeks: 5/2012 - 13/2012 (9 weeks)
  - Influenza epidemic months: January 2012, February 2012, March 2012
- 2012/2013[[2]](#footnote-2)
  - National epidemic threshold: 69 consultations for cases of influenza-like illness per week per 100’000 inhabitants
  - Influenza epidemic weeks: 1/2013 - 12/2013 (12 weeks)
  - Influenza epidemic months: December 2012, January 2013, February 2013, March 2013
- 2013/2014[[3]](#footnote-3)
  - National epidemic threshold: 74 consultations for cases of influenza-like illness per week per 100’000 inhabitants
  - Influenza epidemic weeks: 4/2014 - 10/2014 (7 weeks)
  - Influenza epidemic months: January 2014, February 2014, March 2014
- 2014/2015[[4]](#footnote-4)
  - National epidemic threshold: 70 consultations for cases of influenza-like illness per week per 100’000 inhabitants
  - Influenza epidemic weeks: 2/2015 - 13/2015 (12 weeks)
  - Influenza epidemic months: January 2015, February 2015, March 2015
- 2015/2016[[5]](#footnote-5)
  - National epidemic threshold: 68 consultations for cases of influenza-like illness per week per 100’000 inhabitants
  - Influenza epidemic weeks: 2/2016 - 13/2016 (12 weeks)
  - Influenza epidemic months: January 2016, February 2016, March 2016, April 2016
- 2016/2017[[6]](#footnote-6)
  - National epidemic threshold: 64 consultations for cases of influenza-like illness per week per 100’000 inhabitants
  - Influenza epidemic weeks: 50/2016 - 8/2017 (11 week)
  - Influenza epidemic months: December 2016, January 2017, February 2017
- 2017/2018[[7]](#footnote-7)
  - National epidemic threshold: 68 consultations for cases of influenza-like illness per week per 100’000 inhabitants
  - Influenza epidemic weeks: 51/2017 - 13/2018 (15 weeks)

Influenza epidemic months: December 2017, January 2018, February 2018, March 2018

1. Bundesamt für Gesundheit. (2012). Saisonale Grippe 2011/12 Epidemiologie, Virologie, Impfstoffversorgung und -zusammensetzung. *BAG-Bulletin*, *30*, 503–510. [↑](#footnote-ref-1)
2. Bundesamt für Gesundheit. (2013). Saisonale Grippe 2012/13: Epidemiologie, Virologie, Impfstoffversorgung und -zusammensetzung. *BAG-Bulletin*, *38*, 655–661. [↑](#footnote-ref-2)
3. Bundesamt für Gesundheit. (2014). Saisonale Grippe 2013/14 Epidemiologie, Virologie, Impfstoffversorgung und -zusammensetzung. *BAG-Bulletin*, *27*, 459–466. [↑](#footnote-ref-3)
4. Bundesamt für Gesundheit. (2015). Saisonale Grippe 2014/2015 Epidemiologie, Virologie, Impfstoffversorgung und -zusammensetzung. *BAG-Bulletin*, *28*, 529–537. [↑](#footnote-ref-4)
5. Bundesamt für Gesundheit. (2016). Saisonbericht Grippe 2015/16. *BAG-Bulletin*, *37*, 559–566. [↑](#footnote-ref-5)
6. Bundesamt für Gesundheit. (2017). Saisonbericht Grippe 2016/2017. *BAG-Bulletin*, *31*, 7–17. [↑](#footnote-ref-6)
7. Bundesamt für Gesundheit. (2018). Bericht zur Grippesaison 2017/18. *BAG-Bulletin*, *32*, 9–21. [↑](#footnote-ref-7)
